# Supplementary material for: Recyclable magnetic covalent organic framework for the extraction of marine biotoxins
Source: Royal Society of Chemistry journal article supplement (doi:10.1039/c9nr00388f), 2019-01-01
Supplement: c9nr00388f1.pdf [file c9nr00388f1.pdf]

## Electronic Supplementary Information for

# Recyclable magnetic covalent organic framework for the extraction of marine biotoxins

*Vanesa Romero,<sup>a,b</sup> Soraia P. S. Fernandes,<sup>a,c</sup> Laura Rodriguez-Lorenzo,<sup>a</sup> Yury V. Kolen'ko,<sup>a</sup>*

*Begoña Espiña,<sup>\*,a</sup> Laura M. Salonen<sup>\*,a</sup>*

<sup>a</sup>International Iberian Nanotechnology Laboratory (INL), Av. Mestre José Veiga, 4715-330

Braga, Portugal

<sup>b</sup>Departamento de Química Analítica y Alimentaria, Área de Química Analítica, Facultad de

Química, Universidad de Vigo, Campus As Lagoas-Marcosende, 36310 Vigo, Spain

<sup>c</sup>Department of Chemistry, QOPNA, University of Aveiro, Campus Universitário de Santiago,

3810-193 Aveiro, Portugal

\*Corresponding Author: [begona.espina@inl.int](mailto:begona.espina@inl.int); [laura.salonen@inl.int](mailto:laura.salonen@inl.int)

## Contents

|                                                                                                         |    |
|---------------------------------------------------------------------------------------------------------|----|
| 1. Abbreviations.....                                                                                   | 3  |
| 2. Materials and Methods .....                                                                          | 4  |
| 3. <i>o</i> -Phthaldialdehyde (OPA) assay.....                                                          | 7  |
| 4. Experimental conditions for the synthesis of mTpBD-Me <sub>2</sub> .....                             | 10 |
| 5. Thermogravimetric analyses (TGA).....                                                                | 11 |
| 6. Fourier-transform infrared (FT-IR) .....                                                             | 14 |
| 7. Small angle X-ray scattering (SAXS) .....                                                            | 15 |
| 8. X-Ray diffraction (XRD).....                                                                         | 17 |
| 9. N <sub>2</sub> physisorption .....                                                                   | 18 |
| 10. Magnetic measurements.....                                                                          | 21 |
| 11. Scanning electron microscopy (SEM).....                                                             | 22 |
| 12. Transmission electron microscopy (TEM) and energy-dispersive X-ray spectroscopy (EDX) analysis..... | 23 |
| 13. Adsorption and desorption of OA and DTX-1 .....                                                     | 25 |
| 14. Recycling .....                                                                                     | 35 |
| 15. Biotxin structures .....                                                                            | 37 |
| 16. Magnetic separation of 0.2-mTpBD-Me <sub>2</sub> from seawater and 2-propanol .....                 | 38 |
| 17. References .....                                                                                    | 39 |

## 1. Abbreviations

|                    |                                          |
|--------------------|------------------------------------------|
| AE                 | Adsorption efficiency                    |
| APTES              | 3-(Aminopropyl)triethoxysilane           |
| Aq.                | Aqueous                                  |
| BET                | Brunauer–Emmett–Teller                   |
| BD-Me <sub>2</sub> | <i>o</i> -Tolidine                       |
| COF                | Covalent organic framework               |
| DOPA               | Dopamine                                 |
| DSP                | Diarrhetic shellfish poisoning           |
| DTX-1              | Dinophysistoxin-1                        |
| EDX                | Energy dispersive X-ray spectroscopy     |
| EFSA               | European Food Safety Agency              |
| FT-IR              | Fourier-transform infrared               |
| HAB                | Harmful algal bloom                      |
| MSPE               | Magnetic solid-phase extraction          |
| NP                 | Nanoparticle                             |
| OA                 | Okadaic acid                             |
| OPA                | <i>o</i> -Phthaldialdehyde               |
| QSDFT              | Quenched-solid density functional theory |
| RT                 | Room temperature                         |
| RSD                | Relative standard deviation              |
| SD                 | Standard deviation                       |
| SAXS               | Small angle X-ray scattering             |
| SEM                | Scanning electron microscopy             |
| TEF                | Toxic equivalent factor                  |
| TEM                | Transmission electron microscopy         |
| TGA                | Thermogravimetric analysis               |
| TP                 | Triformylphloroglucinol                  |
| VSM                | Vibrating sample magnetometer            |
| XRD                | X-ray diffraction                        |

## 2. Materials and Methods

### Reagents and chemicals

Iron(III) chloride hexahydrate 99% and iron(II) chloride tetrahydrate 99% were purchased from Sigma Aldrich, ammonium hydroxide 25% extra pure from Acros Organics, and dopamine hydrochloride 98% from TCI.

*o*-Phthaldialdehyde 99% and 2-mercaptoethanol 99% from Sigma-Aldrich dissolved in absolute ethanol 99.8% from Riedel-de-Häen were used as reagents in the OPA assay. Butylamine 99% from Sigma-Aldrich was used as standard for the calibration curve. Boric acid 99.9% from Merck was used to prepare the 50 mM aq. borate buffer solution (pH 9).

Hexamethylenetetraamine 99.5% from Sigma-Aldrich, anhydrous phloroglucinol 99% from Acros Organics, and trifluoroacetic acid HPLC grade from Fischer Chemical were used for the synthesis of Tp. Commercial hydrochloric acid 37% from Fischer Chemical was used to prepare the aq. 3 M HCl solution. *o*-Tolidine 98% from TCI and dioxane extra dry 99.5% from Acros Organics were used for TpBD-Me<sub>2</sub> synthesis. The aq. 6 M acetic acid used as catalyst was prepared by dilution of commercial acetic acid 99.8% from EMD-Millipore.

Dichloromethane HPLC grade, tetrahydrofuran HPLC grade from Fischer Chemical (Leics, UK), and acetone 99.5% from Riedel-de-Häen (Seelze, Germany) were used for the washing of the obtained products.

Okadaic acid from *Prorocentrum* sp. was purchased from Merck-Calbiochem. 6,8-Difluoro-4-methylumbelliferyl phosphate (DiFMUP) was purchased from Molecular Probes. Protein phosphatase-1 (PP1) catalytic sub-unit ( $\alpha$ -isoform from rabbit), synthetic ASTM seawater, and all other reagents for OA quantification were purchased from Sigma-Aldrich.

### Synthesis of mTpBD-Me<sub>2</sub>

Ultrapure water was produced by Milli-Q Advantage A10 system (Millipore; resistivity = 18.2 M $\Omega$  cm<sup>-1</sup>). Pressure tubes of 100 mL (ACE glass, bushing type back seal, 17.8 cm x 38.1 mm)

and 15 mL (ACE glass, bushing type back seal, 10.2 cm x 25.4 mm) were used for the pre-functionalization of Fe<sub>3</sub>O<sub>4</sub>@DOPA and mTpBD-Me<sub>2</sub> synthesis, respectively. A NdFeB magnet was used for the isolation of the magnetic nanoparticles and mTpBD-Me<sub>2</sub>.

### **Characterization**

Horiba Scientific Fluoromax-4 spectrofluorometer was used for fluorescent quantification of primary amine groups by OPA assay. Excitation wavelength of 336 nm was used and the emission was measured in the range 350–600 nm. Clear-sided 1 mL quartz cuvette was used for the measurements.

Infrared (IR) spectra were recorded on a Bruker VERTEX 80v FT-IR spectrometer in ATR (attenuated total reflection) mode. IR data is background-corrected and reported in frequency of absorption (cm<sup>-1</sup>).

Small and wide angle X-ray scattering (SAXS) measurements were performed on an Anton Paar SAXSess mc2 instrument operating at 40 kV and 50 mA. Data were collected with an image plate detector. Samples were placed in a holder with Mylar windows for the measurement. Data are background corrected.

X-Ray diffraction (XRD) analyses were performed on a PANalytical X'Pert PRO MRD diffractometer operating at 45 kV and 40 mA.

Thermogravimetric analyses (TGA) were carried out using a TGA/DSC 1 STAR<sup>®</sup> system from Mettler Toledo. The sample was heated from 30 °C to 900 °C with a heating rate of 5 °C min<sup>-1</sup> under Ar atmosphere.

Nitrogen sorption measurements were carried out at 77 K using a Quantachrome Autosorb IQ2 automated analyzer. Powder samples were outgassed by heating to 120 °C (heating rate: 5 °C min<sup>-1</sup>, dwell time: 720 min). Surface areas were estimated by the multipoint Brunauer–Emmett–Teller (BET) method using ASiQwin(TM) software. Pore size distributions

were estimated using quenched-solid density functional theory (QSDFT) model for slit/cylindrical pores (adsorption branch; N<sub>2</sub> at 77 K on carbon).

A Quanta 650 field-emission scanning electron microscope operating at 3 kV and a JEOL-2100 transmission electron microscope operating at 80 kV were used to characterize the morphology of the synthesized materials. For SEM characterization, the samples were prepared by adhesion of the sample directly on a conductive double-sided copper tape attached to SEM pin stub. For TEM characterization, the samples were dispersed in 2-propanol and a 3 μL of the dispersion were deposited onto a copper grid with Formvar/carbon layer. Samples were left at room temperature until dry.

Magnetization was studied with a vibrating sample magnetometer (MPMS-SQUID-VSM, LOT-Oriel) working at room temperature. The samples were prepared by placing around 5 mg of sample into gelatin capsules. The capsules were closed with a small piece of cotton and the sample compressed gently with a glass rod.

A microtiter plate reader model Synergy H1 from Biotek was used for fluorescence detection and quantification of OA and DTX-1 operating at 37 °C (excitation wavelength 315 nm, emission wavelength 470 nm).

### 3. *o*-Phthaldialdehyde (OPA) assay

Borate buffer solution (50 mM) at pH 9.0 was used as reaction buffer. 2-Mercaptoethanol at a concentration of 5  $\mu\text{L mL}^{-1}$  in ethanol and *o*-phthaldialdehyde (OPA) at 10  $\text{mg mL}^{-1}$  in ethanol were prepared. OPA solution must be protected from light. A series of standard amine solutions ranging from 0.03 mM to 0.53 mM were prepared by dilution of a butylamine stock solution (5 mM in ultrapure water) with ultrapure water. These standards were used to obtain a calibration curve by plotting the obtained fluorescence intensity versus the concentration of  $-\text{NH}_2$  groups in mmol. For the  $\text{Fe}_3\text{O}_4@DOPA$  or  $\text{Fe}_3\text{O}_4@DOPA\text{-Tp}$  samples, around 3 mg of the material were dispersed in ultrapure water by ultrasonication for 10 min.

To prepare the OPA reagent, 883  $\mu\text{L}$  of borate buffer solution, 83  $\mu\text{L}$  of 2-mercaptoethanol (5  $\mu\text{L mL}^{-1}$  in ethanol), and 34  $\mu\text{L}$  of OPA (10  $\text{mg mL}^{-1}$  in ethanol) were mixed and left standing for 2 h at room temperature in the dark. Afterwards, 34  $\mu\text{L}$  of the sample were added and the fluorescence was recorded 1 min after addition. Excitation wavelength was set at 336 nm; emission at 450 nm.

The concentration of  $-\text{NH}_2$  groups in the sample was determined by interpolation of the calibration curve.

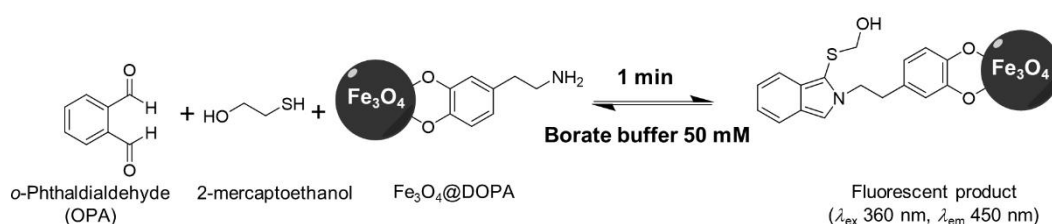

**Scheme S3.1.** Reaction of OPA with amines to form a fluorescent product.

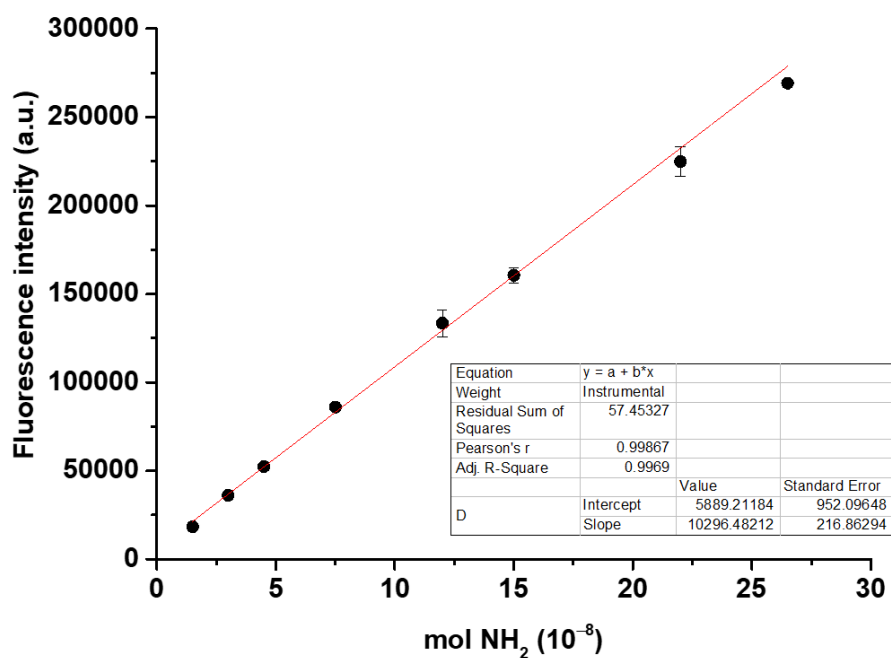

**Figure S3.1.** Calibration curve for OPA assay using butylamine as standard.

**Table S3.1.** Quantification of available  $-NH_2$  moieties on the synthesized  $Fe_3O_4@DOPA$  from three different batches.

| Batch | mg of $Fe_3O_4@DOPA$ used for OPA assay | mmol $-NH_2$ | mmol $-NH_2\ g^{-1}$ NPs |
|-------|-----------------------------------------|--------------|--------------------------|
| 1     | 3.3                                     | 0.00041      | 0.125                    |
| 2     | 3.8                                     | 0.00039      | 0.102                    |
| 3     | 3.1                                     | 0.00035      | 0.112                    |



### Calculation of not polymerized dopamine (%) in the synthesized Fe<sub>3</sub>O<sub>4</sub>@DOPA NPs

TGA analysis of Fe<sub>3</sub>O<sub>4</sub>@DOPA NPs showed an organic content of around 15% attributed to the DOPA layer. Taking into account that 16 mg of Fe<sub>3</sub>O<sub>4</sub>@DOPA NPs were used for TGA analysis, we can estimate that 2.5 mg correspond to the organic coating. Assuming that the organic coating is all as dopamine (MW = 153.18 g mol<sup>-1</sup>) we can estimate the amount of free NH<sub>2</sub> groups as 0.017 mmol.

On the other hand, quantification of free primary amino groups (OPA assay, see above) gave a content of 0.125 mmol of NH<sub>2</sub> per gram of NPs. Taking into account that 6.7 mg of Fe<sub>3</sub>O<sub>4</sub>@DOPA NPs were used for OPA assay, we can calculate the experimental amount of NH<sub>2</sub> as 0.00083 mmol of NH<sub>2</sub>.

- Calculated free NH<sub>2</sub> (mmol) from TGA = 0.017 mmol
- Experimental free NH<sub>2</sub> (mmol) from OPA assay = 0.00083 mmol

$$\frac{0.00083 \text{ mmol } NH_2}{0.017 \text{ mmol } NH_2} \times 100 \cong 5 \% \text{ DOPA}$$

#### 4. Experimental conditions for the synthesis of mTpBD-Me<sub>2</sub>

**Table S4.1** Experimental conditions for the synthesis of mTpBD-Me<sub>2</sub>.

| Reagents                                 | Name | 0.005-<br>mTpBD-<br>Me <sub>2</sub> | 0.025-<br>mTpBD-<br>Me <sub>2</sub> | 0.05-<br>mTpBD-<br>Me <sub>2</sub> | 0.1-<br>mTpBD-<br>Me <sub>2</sub> | 0.2-<br>mTpBD-<br>Me <sub>2</sub> | 0.4-<br>mTpBD-<br>Me <sub>2</sub> |
|------------------------------------------|------|-------------------------------------|-------------------------------------|------------------------------------|-----------------------------------|-----------------------------------|-----------------------------------|
| <b>Tp, mg</b><br>[mmol]                  |      | 1<br>[0.005]                        | 2<br>[0.025]                        | 10.5<br>[0.05]                     | 21<br>[0.1]                       | 42<br>[0.2]                       | 84<br>[0.4]                       |
| <b><i>o</i>-Tolidine, mg</b><br>[mmol]   |      | 1.6<br>[0.075]                      | 8<br>[0.038]                        | 16<br>[0.075]                      | 32<br>[0.15]                      | 64<br>[0.3]                       | 127<br>[0.6]                      |
| <b>Aq. acetic acid 6 M,</b><br><b>μL</b> |      | 3                                   | 15                                  | 30                                 | 60                                | 120                               | 233                               |

Molar ratio: Tp/*o*-tolidine 1:1.5; Tp/acetic acid 1:3.5;  
Fe<sub>3</sub>O<sub>4</sub>@DOPA-Tp (25 mg mL<sup>-1</sup>) dispersed in dioxane: 2 mL;  
Anhydrous dioxane: 3 mL

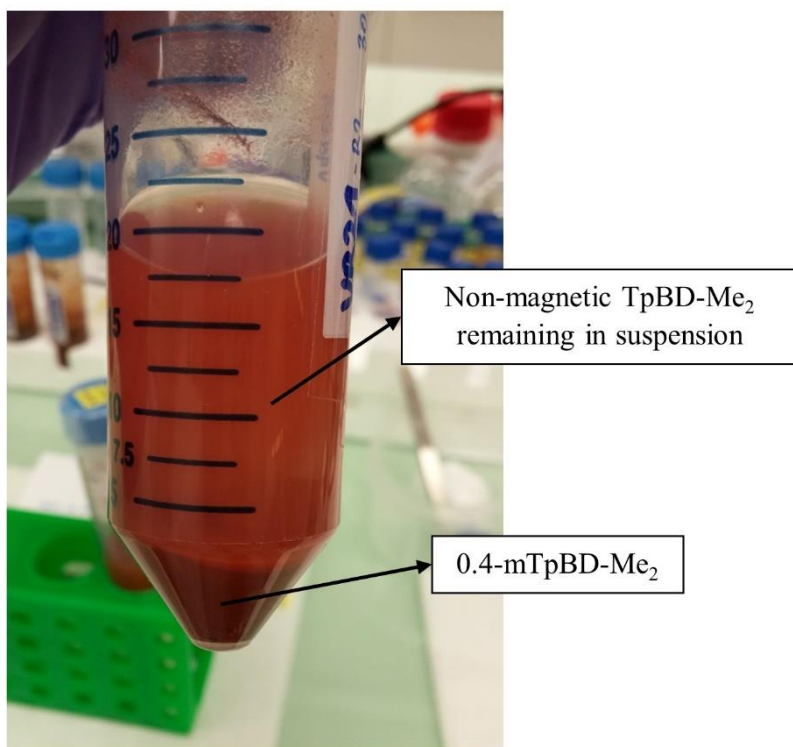

**Figure S4.1.** Image of the reaction medium after synthesis of 0.4-mTpBD-Me<sub>2</sub> using Tp amount of 80 mmol.

## 5. Thermogravimetric analyses (TGA)

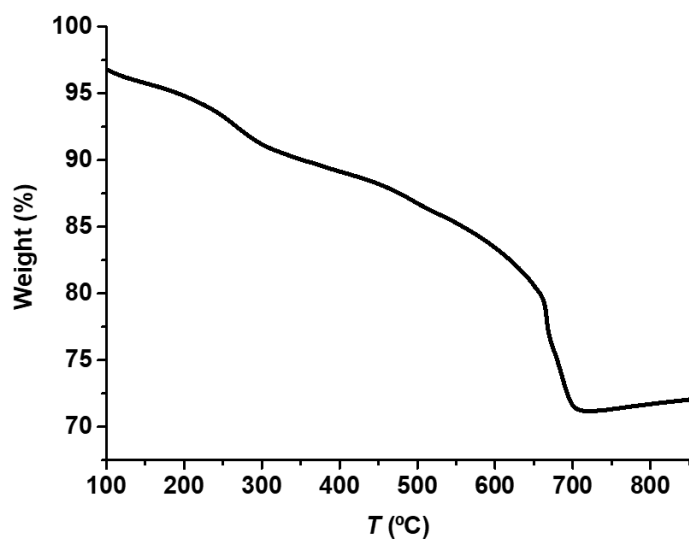

Figure S5.1. TGA data of Fe<sub>3</sub>O<sub>4</sub>@DOPA.

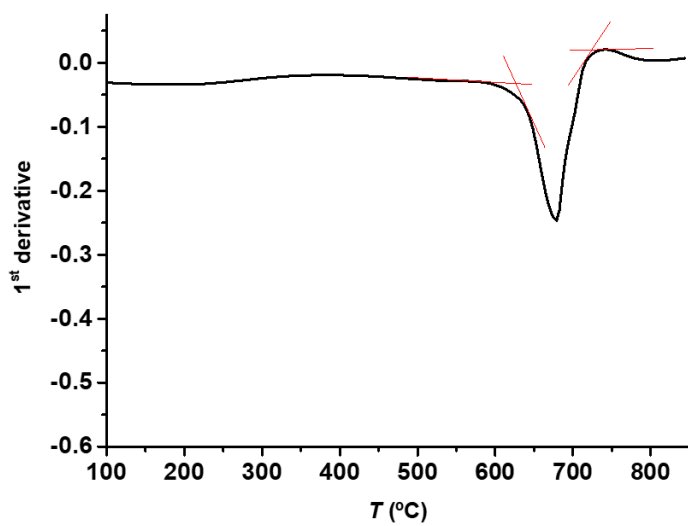

Figure S5.2. 1<sup>st</sup> Derivative of the TGA data of Fe<sub>3</sub>O<sub>4</sub>@DOPA.

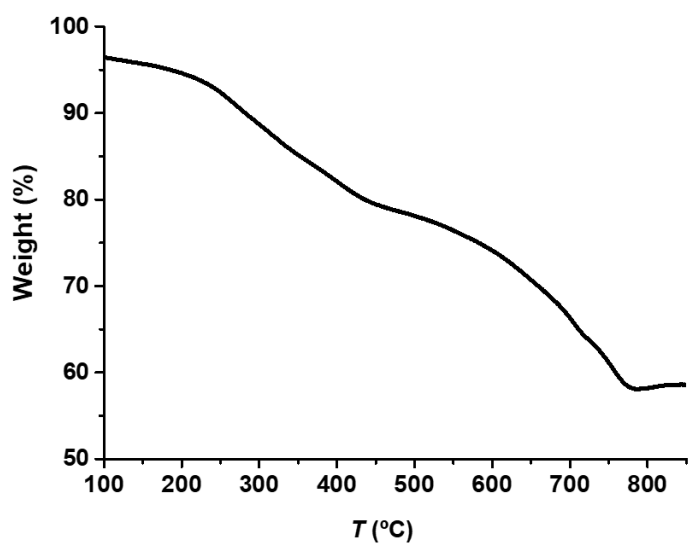

Figure S5.3. TGA data of Fe<sub>3</sub>O<sub>4</sub>@DOPA-Tp.

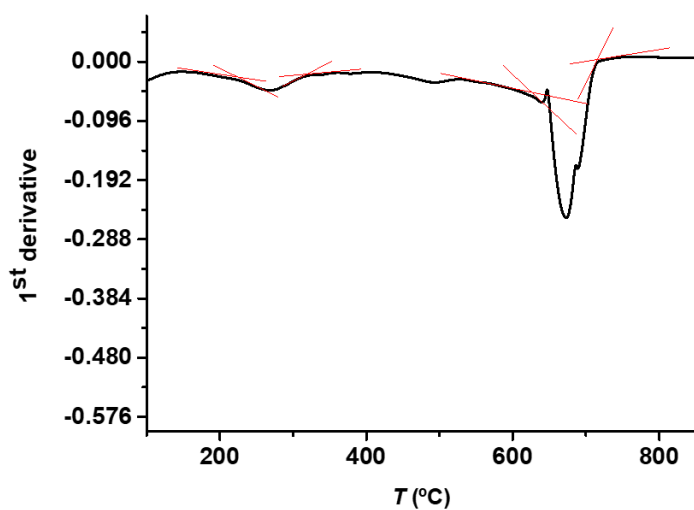

Figure S5.4. 1<sup>st</sup> Derivative of the TGA data of Fe<sub>3</sub>O<sub>4</sub>@DOPA-Tp.

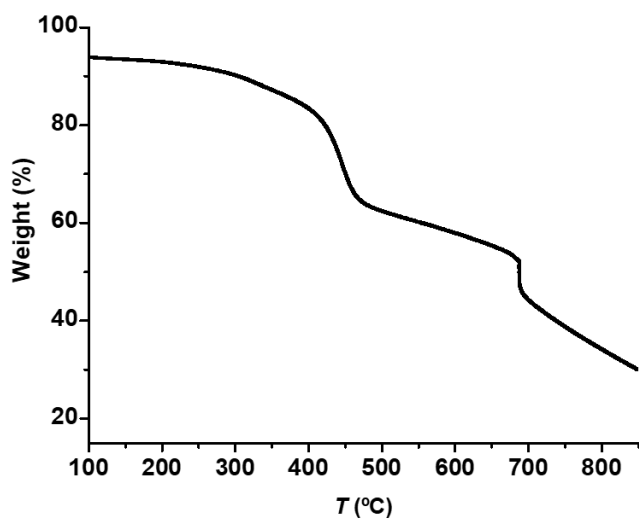

Figure S5.5. TGA data of 0.2-mTpBD-Me<sub>2</sub>.

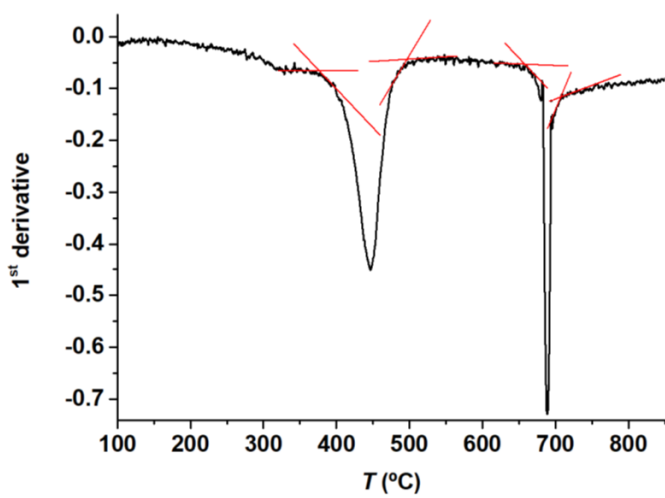

Figure S5.6. 1<sup>st</sup> derivative TGA data of 0.2-mTpBD-Me<sub>2</sub>.

## 6. Fourier-transform infrared (FT-IR)

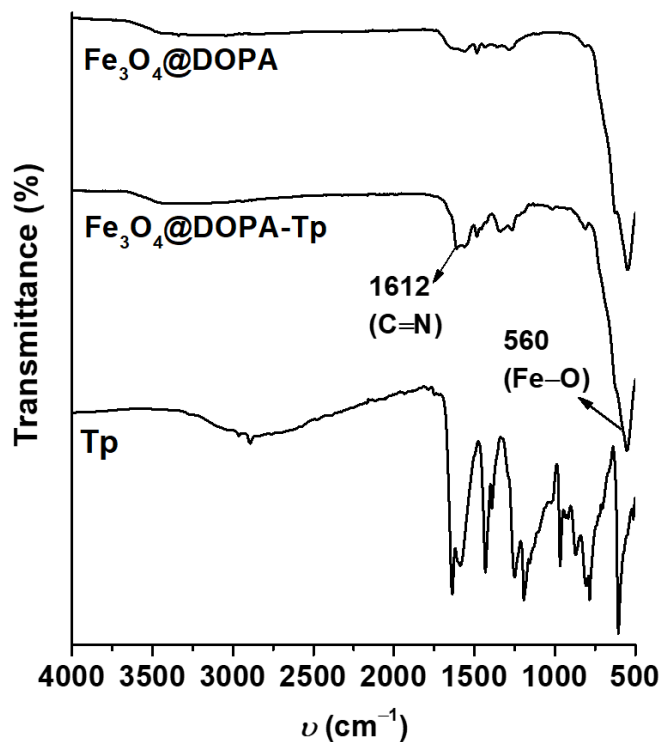

Figure S6.1. FT-IR spectrum of FT-IR spectra of Fe<sub>3</sub>O<sub>4</sub>@DOPA, Fe<sub>3</sub>O<sub>4</sub>@DOPA-Tp, and Tp.

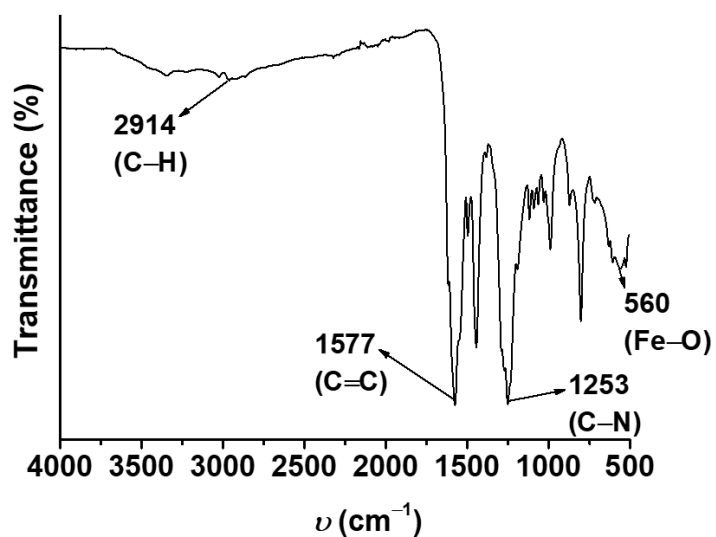

Figure S6.2. FT-IR spectrum of 0.2-mTpBD-Me<sub>2</sub>.

## 7. Small angle X-ray scattering (SAXS)

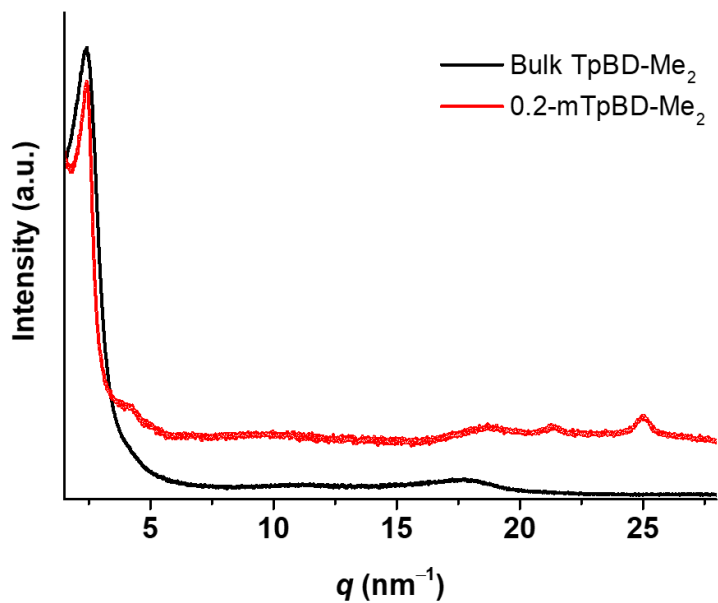

Figure S7.1. SAXS patterns of bulk TpBD-Me<sub>2</sub> (black) and 0.2-mTpBD-Me<sub>2</sub> (red).

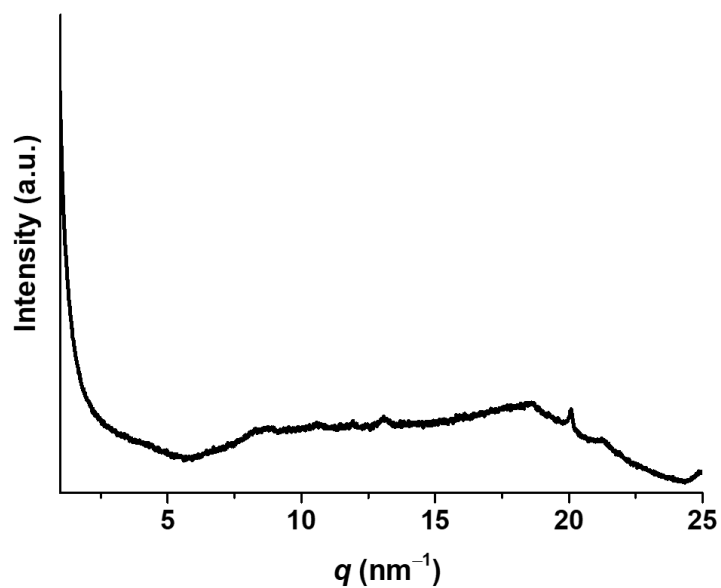

Figure S7.2. SAXS pattern of the obtained product using conditions of 0.2-mTpBD-Me<sub>2</sub> with non-pre-functionalized Fe<sub>3</sub>O<sub>4</sub>@DOPA nanoparticles as substrate.

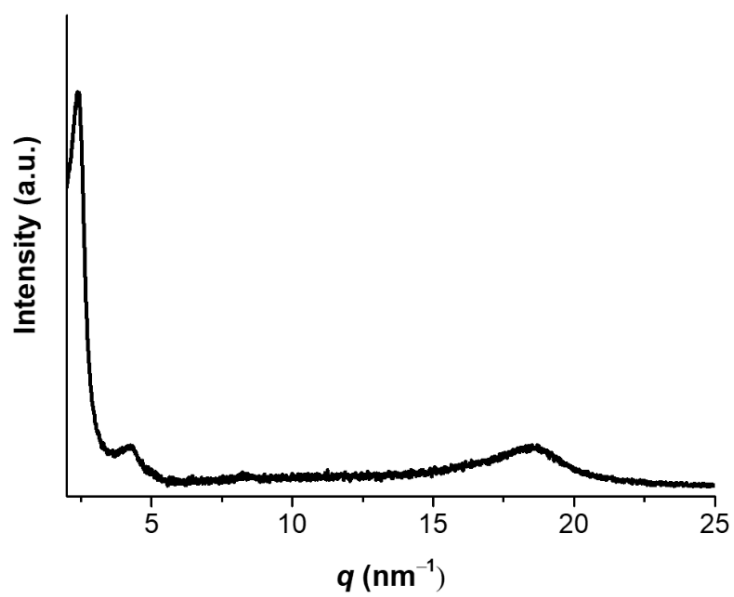

**Figure S7.3.** SAXS pattern of the non-magnetic phase from the synthesis of 0.4-mTpBD-Me<sub>2</sub> corresponding to TpBD-Me<sub>2</sub>.



## 8. X-Ray diffraction (XRD)

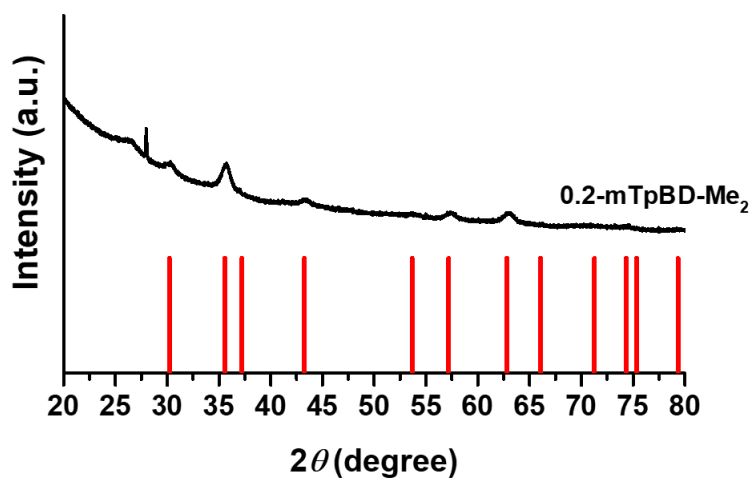

**Figure S8.1.** XRD pattern of 0.2-mTpBD-Me<sub>2</sub> (red lines correspond to the magnetite standard pattern JCPDS 19-0629).

## 9. N<sub>2</sub> physisorption

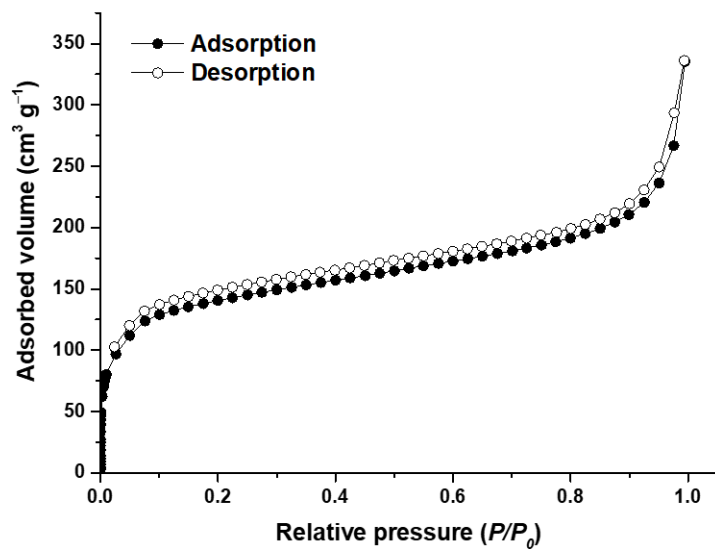

**Figure S9.1.** Nitrogen adsorption (filled circles) and desorption (hollow circles) isotherms of 0.1-mTpBD-Me<sub>2</sub> measured at 77 K.

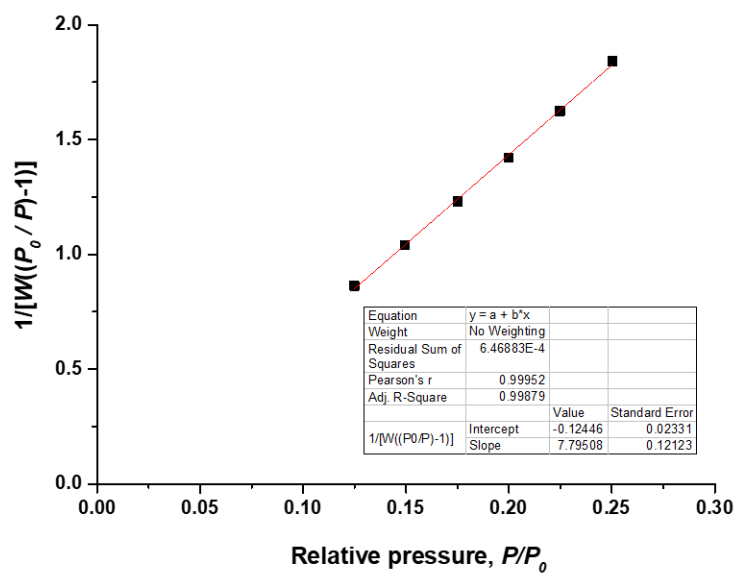

**Figure S9.2.** Multi-point BET plot and linear fit of 0.1-mTpBD-Me<sub>2</sub>.

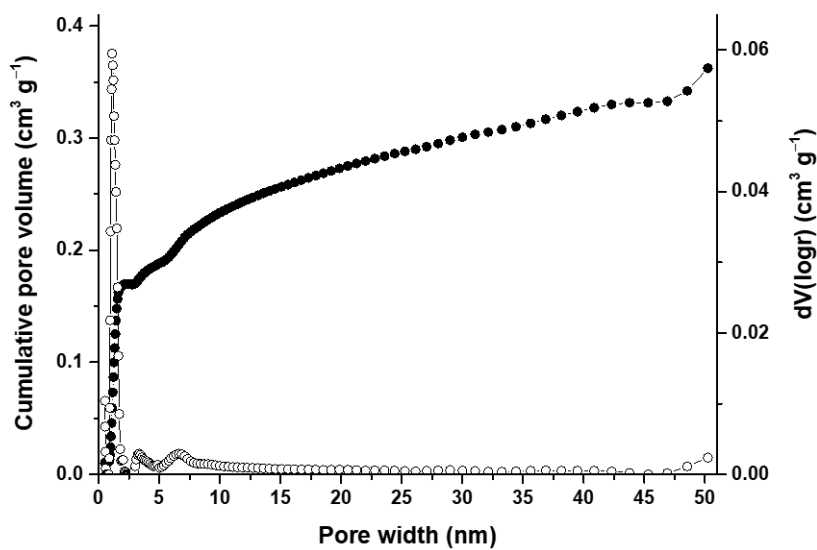

**Figure S9.3.** Pore size distribution (hollow circles) and cumulative pore volume (filled circles) profiles of 0.1-mTpBD-Me<sub>2</sub>.

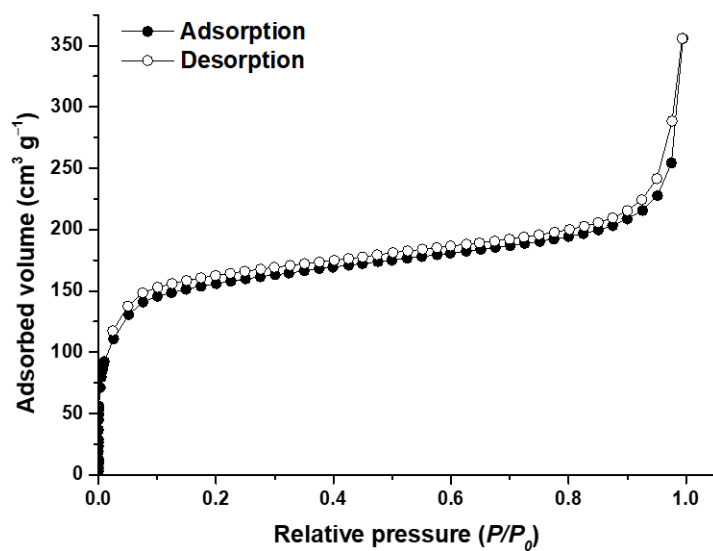

**Figure S9.4.** Nitrogen adsorption (filled circles) and desorption (hollow circles) isotherms of 0.4-mTpBD-Me<sub>2</sub> measured at 77 K.

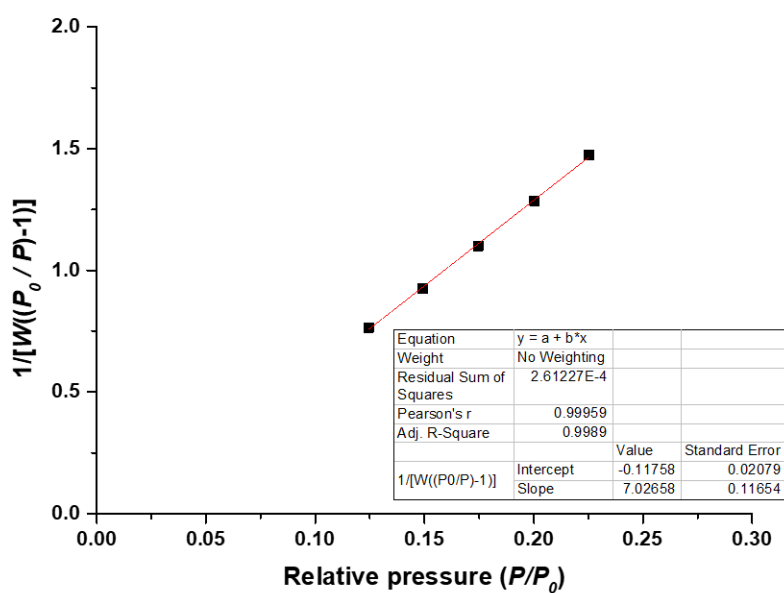

Figure S9.5. Multi-point BET plot and linear fit of 0.4-mTpBD-Me<sub>2</sub>.

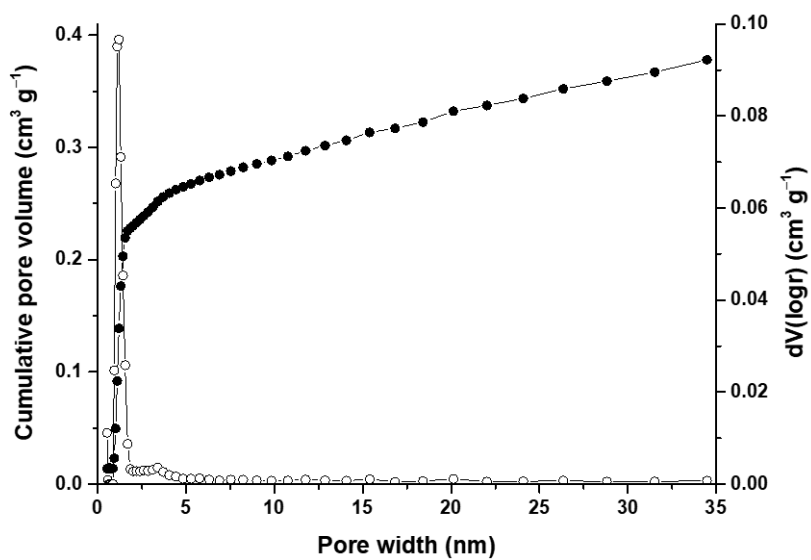

Figure S9.6. Pore size distribution (hollow circles) and cumulative pore volume (filled circles) profiles of 0.4-mTpBD-Me<sub>2</sub>.

## 10. Magnetic measurements

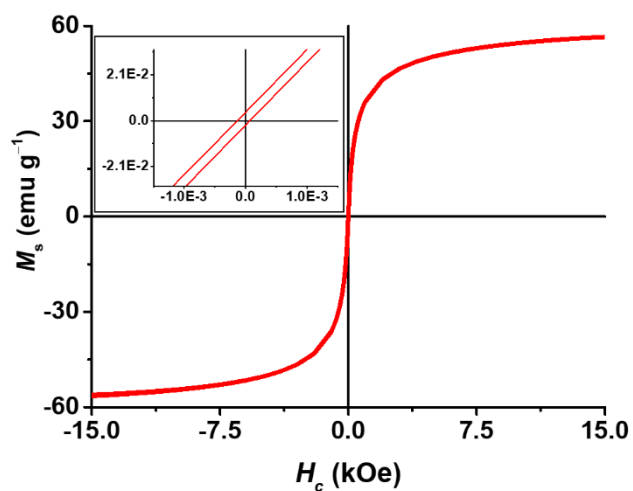

**Figure S10.1.** Hysteresis loop of Fe<sub>3</sub>O<sub>4</sub>@DOPA-Tp

**Table S10.1.** Saturation magnetization ( $M_s$ ) and coercive force ( $H_c$ ) of synthesized Fe<sub>3</sub>O<sub>4</sub>@DOPA, Fe<sub>3</sub>O<sub>4</sub>@DOPA-Tp, and mTpBD-Me<sub>2</sub>.

| Sample                                  | $M_s$ (emu g <sup>-1</sup> ) | $H_c$ (Oe) |
|-----------------------------------------|------------------------------|------------|
| Fe <sub>3</sub> O <sub>4</sub> @DOPA    | 60.5                         | 0.005      |
| Fe <sub>3</sub> O <sub>4</sub> @DOPA-Tp | 61.3                         | 0.060      |
| 0.1-mTpBD-Me <sub>2</sub>               | 13.5                         | 0.100      |
| 0.2-mTpBD-Me <sub>2</sub>               | 9.90                         | 0.150      |
| 0.4-mTpBD-Me <sub>2</sub>               | 4.90                         | 0.330      |

## 11. Scanning electron microscopy (SEM)

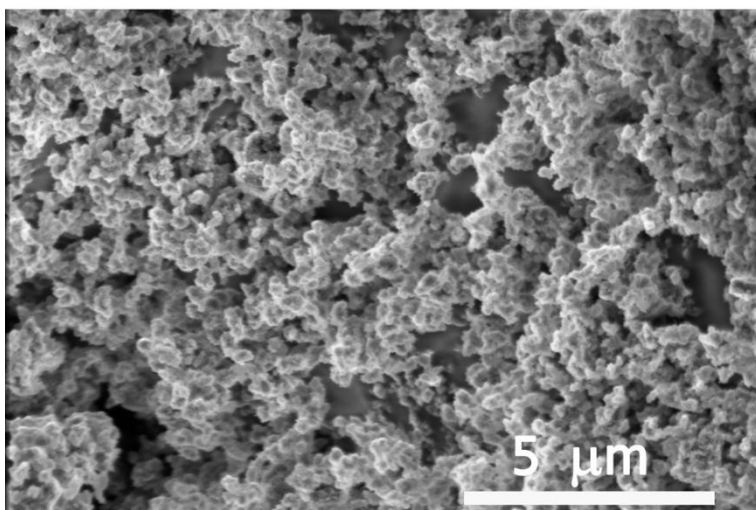

**Figure S11.1.** SEM image of 0.2-mTpBD-Me<sub>2</sub>

12. Transmission electron microscopy (TEM) and energy-dispersive X-ray spectroscopy (EDX) analysis

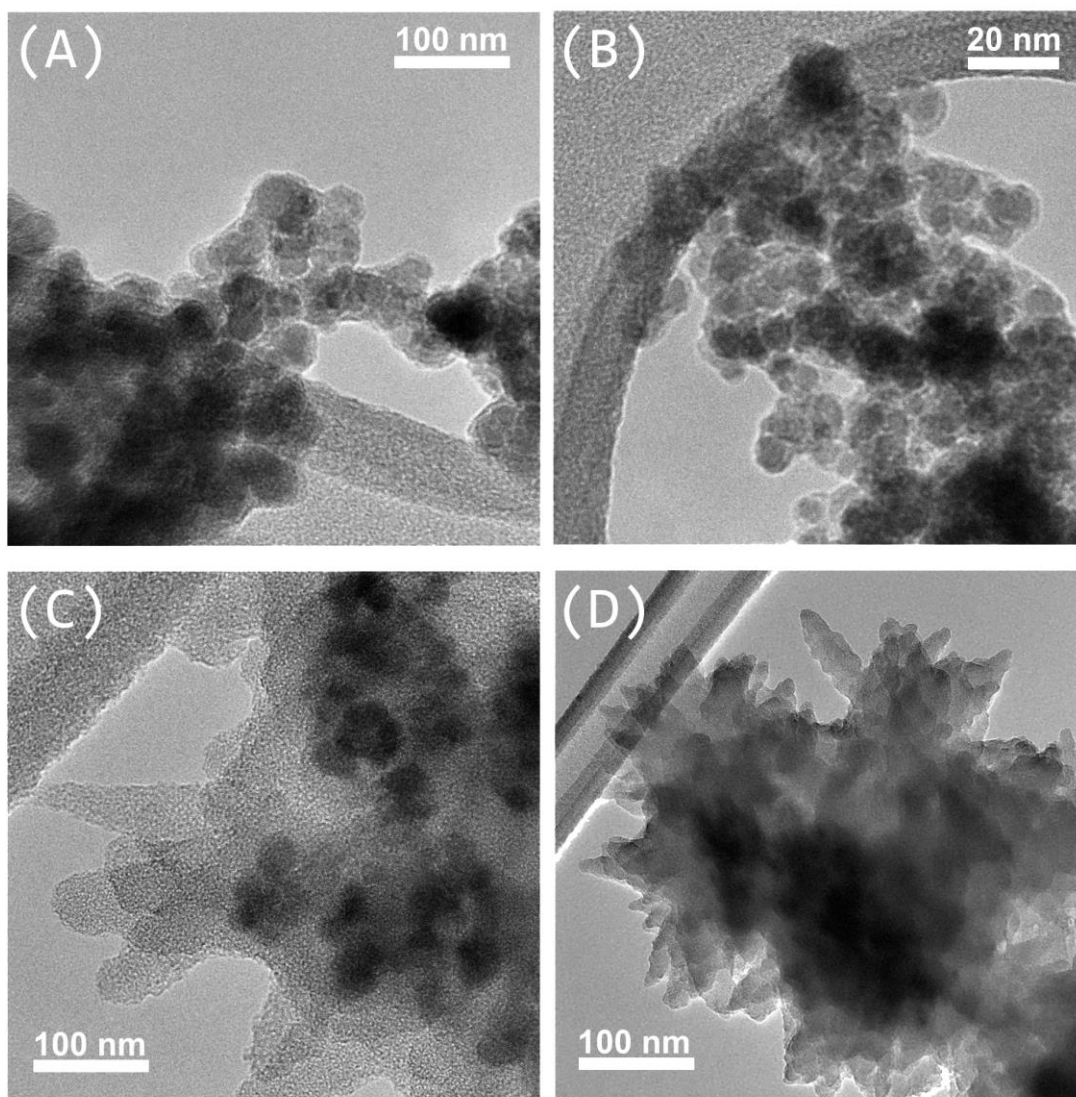

**Figure S12.1.** TEM characterization of  $\text{mTpBD-Me}_2$ : (A) 0.005- $\text{mTpBD-Me}_2$ , (B) 0.025- $\text{mTpBD-Me}_2$ , (C) 0.1- $\text{mTpBD-Me}_2$ , and (D) 0.4- $\text{mTpBD-Me}_2$ . The TEM sequence shows that the COF shell (lighter shell) grows progressively around  $\text{Fe}_3\text{O}_4$  aggregates (dark spots). Inset in B shows the TEM micrograph with high magnification.

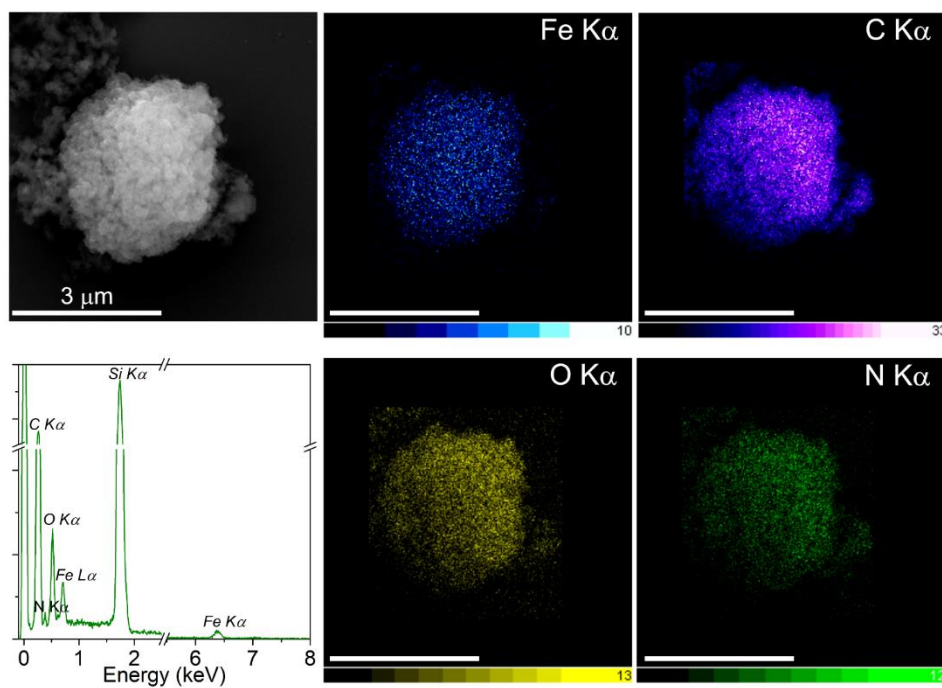

**Figure S12.2.** EDX analysis of crystalline 0.2-mTpBD-Me<sub>2</sub> confirming the presence of both materials (Fe<sub>3</sub>O<sub>4</sub> and TpBD-Me<sub>2</sub>) in the synthesized composite.



### 13. Adsorption and desorption of OA and DTX-1

#### OA and DTX-1 quantification

Reaction buffer consisted of 20 mM Tris-HCl, 5 mM MgCl<sub>2</sub>, 1 mM MnCl<sub>2</sub>, 1 mg mL<sup>-1</sup> bovine serum albumin (BSA), and 0.1% 2-mercaptoethanol at pH = 8. DiFMUP stock solution was prepared at 40 mM in Tris-HCl solution. Biotoxin stock solutions (OA and DTX-1 reconstituted from the lyophilized product) were prepared at 1 mM in absolute ethanol for OA and methanol for DTX-1. A stock solution of PP1 at 3900 U mL<sup>-1</sup> was prepared by reconstitution of the lyophilized product with ultrapure water. Separated calibration curves were used for each quantification experiment of OA and DTX-1 measured in the same microplate with the rest of the samples. OA and DTX-1 standard solutions for the calibration curves were prepared in the corresponding solvent, synthetic seawater for the quantification from the adsorption assays and 2-propanol or 70% ethanol for the quantification of the supernatant from the desorption assays. For the calibration curves, PP1 inhibition assays were performed at a final volume of 200 µL in wells of flat-bottom opaque 96-well microplates. Briefly, first, 10 µL of 0.1 U of PP1 (intermediate solution prepared by dilution of the stock with Tris-HCl solution) were added to the reaction wells containing 165 µL of reaction buffer. Then, 20 µL of the corresponding solution of the biotoxin calibration curve, solvent (blank), or supernatant samples from the adsorption/desorption assays were added to the well. After that, the microplate was incubated during 30 min under constant shaking at 500 rpm at 37 °C for a maximum enzymatic inhibition. Then, 5 µL of 8 mM DiFMUP solution (prepared by dilution of the stock with Tris-HCl solution) was added. After 2 h under constant shaking at 500 rpm at 37 °C, fluorescence intensity was measured (excitation wavelength 315 nm, emission wavelength 470 nm) in a BioTek Synergy H1 microplate reader. Analytical determinations were carried out in duplicate.

## Preparation of 0.2-mTpBD-Me<sub>2</sub> suspensions for MSPE of OA and DTX-1

**Table S13.1.** Amount of 0.2-mTpBD-Me<sub>2</sub> dispersed in 100 µL of synthetic seawater to perform MSPE of OA and DTX-1.

| Composite                 | Organic content from TGA (%) | Amount dispersed (mg) |
|---------------------------|------------------------------|-----------------------|
| 0.2-mTpBD-Me <sub>2</sub> | 84                           | 1.25                  |

### Calibration curves for OA and DTX-1 quantification

Calibration curves were made using the software Origin9® by plotting known concentrations of serial dilutions against their respective fluorescence read at 470 nm. Then, a non-linear pharmacology dose-response fitting was applied. Calibration curves were made using synthetic seawater or 2-propanol as solvent for calibration standard dilutions. Below are exemplary calibration curves made for each biotoxin with the used solvents. The calibration curve for each solvent represents the average fluorescent values from three different experiments. The error bars were calculated as standard deviation (SD).

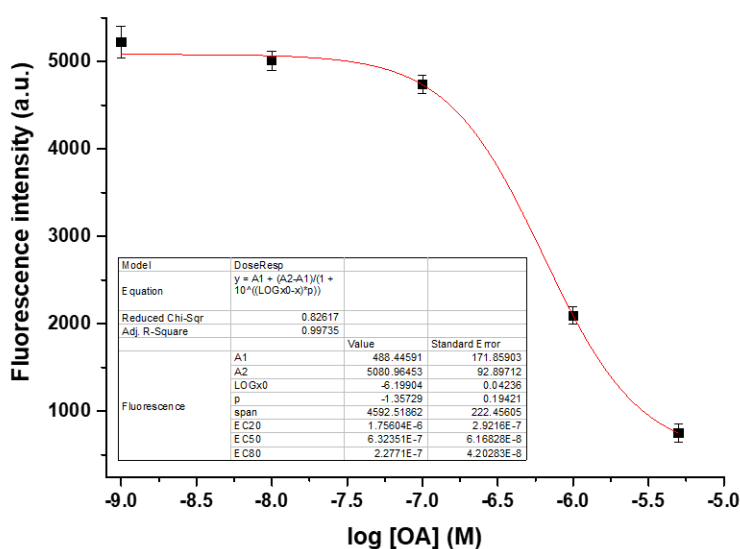

**Figure S13.1.** OA calibration curve in synthetic seawater.

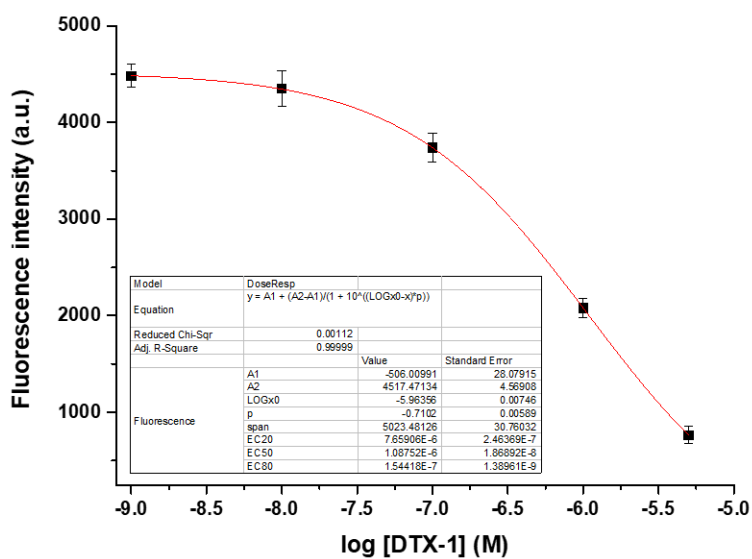

Figure S13.2. DTX-1 calibration curve in synthetic seawater.

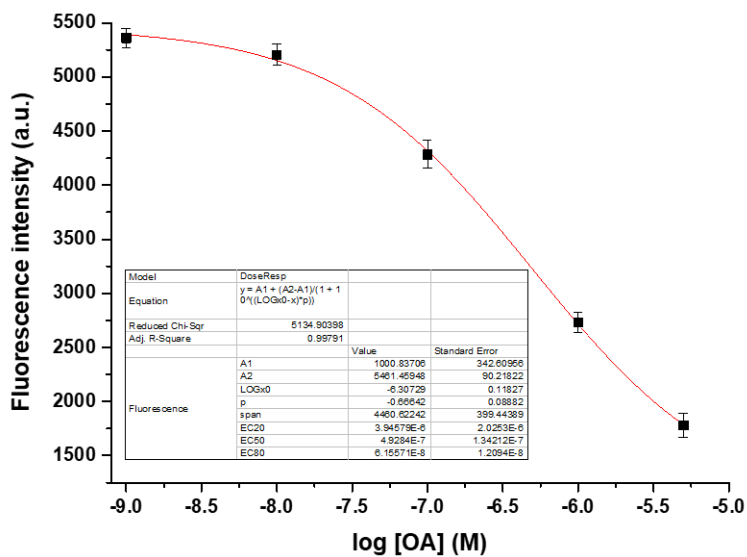

Figure S13.3. OA calibration curve in 2-propanol.

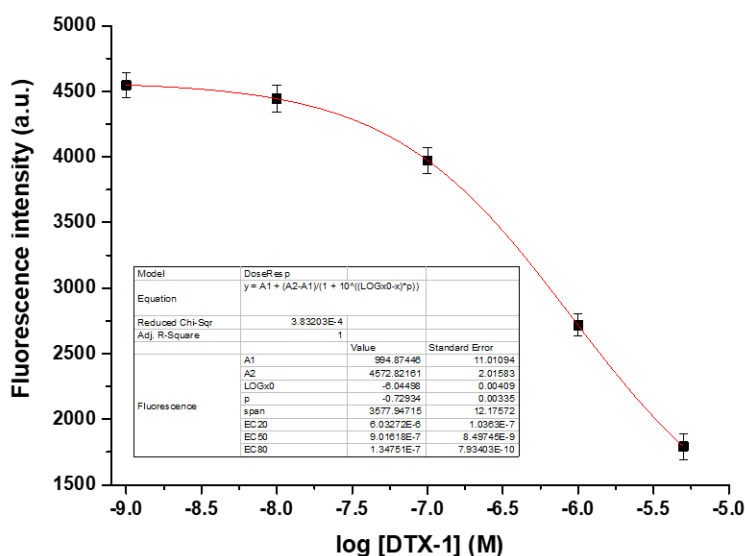

Figure S13.4. DTX-1 calibration curve in 2-propanol.

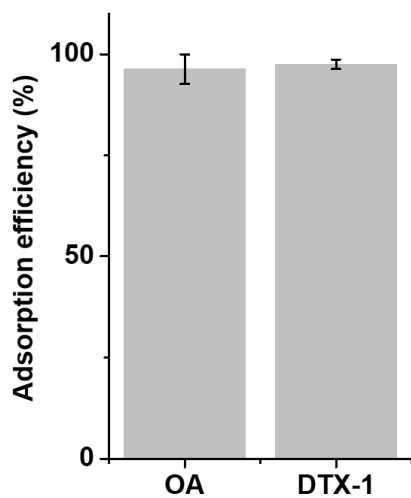

Figure S13.5. OA and DTX-1 adsorption efficiency (%) with 0.2-mTpBD-Me<sub>2</sub>. Samples of 100  $\mu\text{L}$  of mTpBD-Me<sub>2</sub> composite dispersion in synthetic seawater at 1  $\text{mg mL}^{-1}$  COF were spiked with an OA or DTX-1 concentration of 10  $\mu\text{mol L}^{-1}$ , and incubated at 19  $^{\circ}\text{C}$  under constant shaking at 1500 rpm during 120 min. After incubation, the samples were collected by an external magnetic field (10 min). Supernatants were collected and quantified for either OA or DTX-1.

### **Adsorption kinetics**

Samples of 100  $\mu\text{L}$  of 0.2-mTpBD-Me<sub>2</sub> dispersed in synthetic seawater at 1 mg mL<sup>-1</sup> COF were spiked with OA or DTX-1 concentration of 10, 15, 50, or 100  $\mu\text{mol L}^{-1}$ , and incubated at 19 °C under constant shaking at 1500 rpm. After 0.5, 60, 240, and 480 min of incubation, the sample for the corresponding time point was collected by an external magnetic field (10 min). Supernatants were collected and quantified for OA or DTX-1.

Two replicates for each concentration and each time were done. The time used for magnetic separation was added to the time points as time elapsed, resulting in time points of 10.5, 70, 250, and 490 min, respectively.

### **Desorption kinetics**

Samples of 100  $\mu\text{L}$  of 0.2-mTpBD-Me<sub>2</sub> dispersed in synthetic seawater at 1 mg mL<sup>-1</sup> COF were spiked with OA or DTX-1 concentration of 10, 15, 50, or 100  $\mu\text{mol L}^{-1}$ , and incubated at 19 °C under constant shaking at 1500 rpm for 120 min. After incubation, the 0.2-mTpBD-Me<sub>2</sub> composite was separated by applying an external magnetic field for 10 min. The supernatants were collected for quantification of non-adsorbed biotoxin. Before desorption, 0.2-mTpBD-Me<sub>2</sub> was washed with ultrapure water (200  $\mu\text{L}$ , incubation 15 min, 19 °C, 1500 rpm). Then, desorption kinetics were carried out by adding 200  $\mu\text{L}$  of 2-propanol and incubating during 1, 60, 240, or 480 min at 19 °C under constant shaking at 1500 rpm. The solid phase was then collected with an external magnet in 5 min. Supernatants were recovered and analyzed for OA or DTX-1.

Two replicates for each concentration and each time were done. The time used for magnetic separation was added to the time points as time elapsed, resulting in time points of 6, 65, 245, and 485 min, respectively.

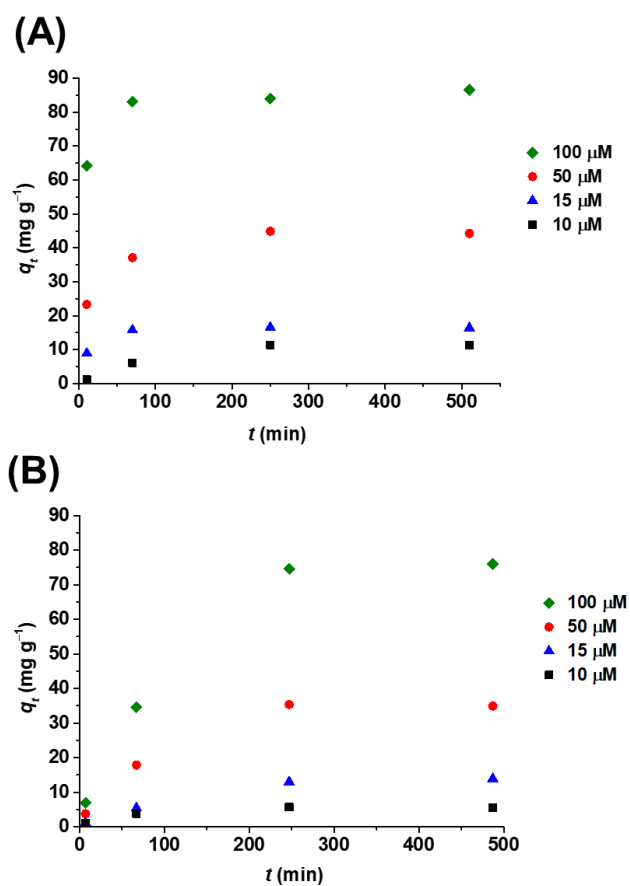

**Figure S13.6.** (A) DTX-1 adsorption kinetic curve of 0.2-mTpBD-Me<sub>2</sub> with initial concentrations of 10, 15, 50, and 100  $\mu\text{mol L}^{-1}$  in seawater at 19 °C; (B) DTX-1 desorption kinetic curve of 0.2-mTpBD-Me<sub>2</sub> with initial concentrations of 10, 15, 50, and 100  $\mu\text{mol L}^{-1}$  in 2-propanol at 19 °C.

### Isotherms at 19 °C

Freundlich equation was used to analyze the equilibrium adsorption isotherm. Freundlich equation is expressed as:<sup>1</sup>

$$\log q_e = \log K_F + \left(\frac{1}{n}\right) \times \log C_e$$

where  $q_e$  is the adsorbate concentration on the adsorbent in equilibrium ( $\text{mg g}^{-1}$ ),  $C_e$  is the equilibrium concentration of adsorbate in solution ( $\text{mg L}^{-1}$ ), and  $n$  and  $K_F$  are characteristic constants.  $K_F$  is an indicator of the adsorption capacity in the Freundlich theory. This constant decreases with increasing temperature and is also related to the strength of adsorbate–sorbent interaction.

The maximum adsorption capacity ( $q_m$ ) can be calculated from the following equation:

$$q_m = K_F C_0^{1/n}$$

where  $C_0$  is the initial concentration of the adsorbate in solution ( $\text{mg L}^{-1}$ ).

The Freundlich model showed a good fit to the experimental data in a moderate solute concentration range, and provides information about the heterogeneity of the surface of the adsorbent by means of  $1/n$  value.

As shown in Table S13.2, the experimental data fitted well to Freundlich model. Furthermore, the constant  $n$  is higher than 1, indicating favorable adsorption and showing the homogeneity of the adsorbent surface. The linear tendency of the isotherm for OA and DTX-1 (Figure S13.6) indicates that the adsorbed amount is proportional to the equilibrium concentration of the solute in the solution. Scarcity and high cost of the OA and DTX-1 toxin standards prevented us from expanding the isotherm to higher concentrations to further confirm the applicability of the Freundlich model.

**Table S13.2.** Freundlich isotherm equation constants and correlation coefficient derived from the graph in Figures S13.6.

| <b>OA</b>                                                  |                                                          |
|------------------------------------------------------------|----------------------------------------------------------|
| Regression equation                                        | $\lg q_e = (0.781 \pm 0.064)\lg C_e + (1.421 \pm 0.040)$ |
| $K_F$ ( $\text{mg}^{1-1/n} \text{g}^{-1} \text{L}^{1/n}$ ) | $26.363 \pm 1.095$                                       |
| $1/n$                                                      | $0.781 \pm 0.064$                                        |
| $n$                                                        | 1.280                                                    |
| $R^2$                                                      | 0.9676                                                   |
| <b>DTX-1</b>                                               |                                                          |
| Regression equation                                        | $\lg q_e = (0.819 \pm 0.080)\lg C_e + (1.352 \pm 0.041)$ |
| $K_F$ ( $\text{mg}^{1-1/n} \text{g}^{-1} \text{L}^{1/n}$ ) | $22.508 \pm 1.101$                                       |
| $1/n$                                                      | $0.819 \pm 0.080$                                        |
| $n$                                                        | 1.221                                                    |
| $R^2$                                                      | 0.9537                                                   |

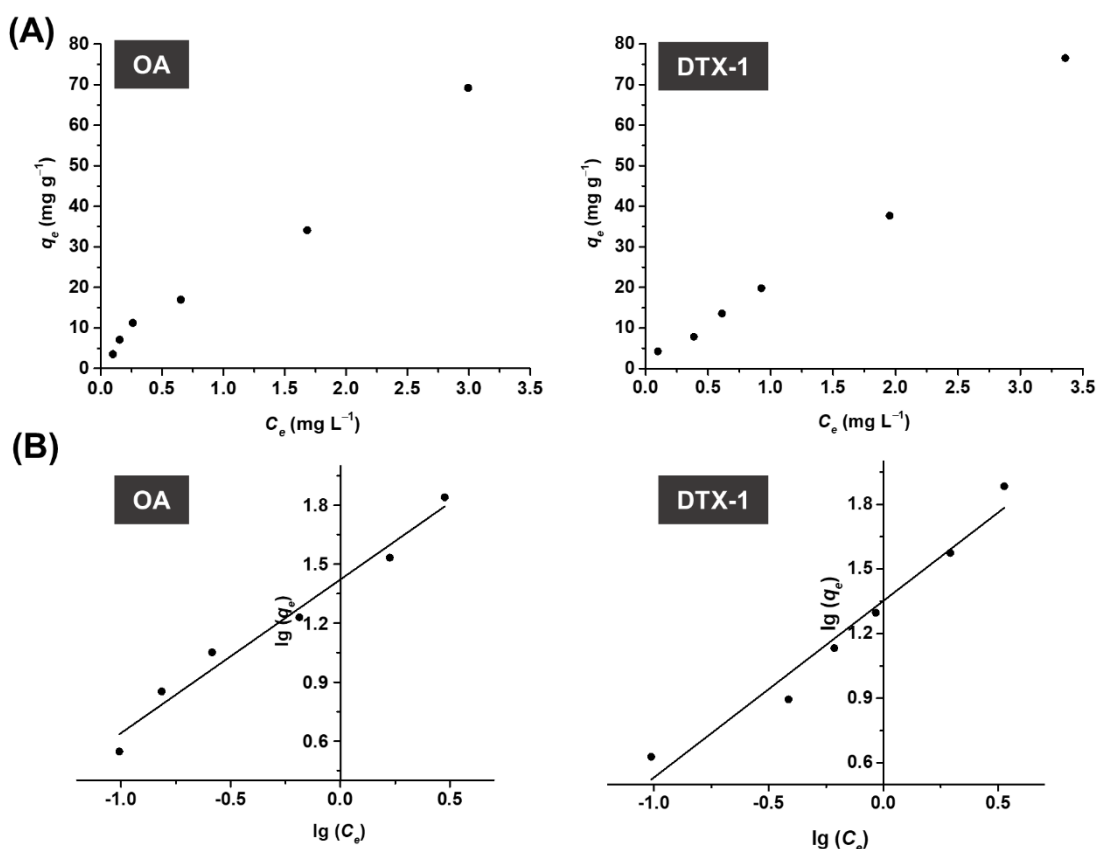

**Figure S13.7.** (A) Amount of biotoxin adsorbed in equilibrium (120 min),  $q_e$  ( $\text{mg g}^{-1}$ ), as a function of biotoxin concentration in equilibrium,  $C_e$  ( $\text{mg L}^{-1}$ ); (B) linear regression of the Freundlich isotherm for the experimental adsorption of OA and DTX-1 by 0.2-mTpBD-Me<sub>2</sub> composite.



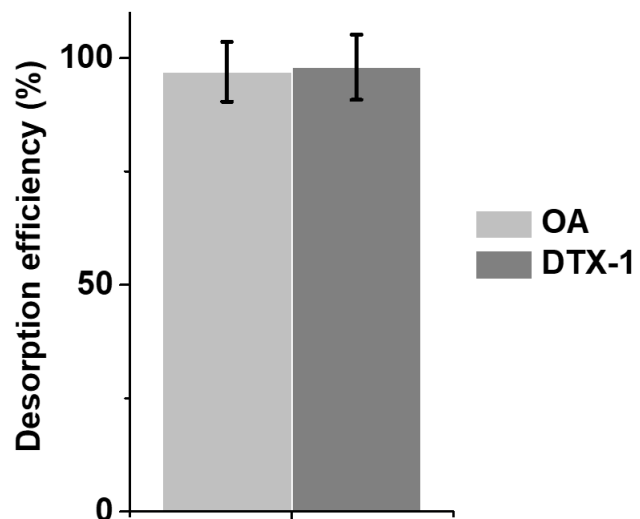

**Figure S13.8.** Quantification of the desorption efficiency (%) from 0.2-mTpBD-Me<sub>2</sub> using 2-propanol at 19 °C (240 min) as solvent after adsorption assays with 10 μM of OA or DTX-1.

**Table S13.3.** Comparison with styrene-based commercial resins SPATTs tested for OA and DTX-1 adsorption from spiked seawater samples. It is clear from the table that despite the lower adsorbent amount and shorter treatment time used with the COF-based 0.2-mTpBD-Me<sub>2</sub> adsorbent, higher adsorption efficiency of both biotoxins is reached.

| Adsorbent                 | Surface area (m <sup>2</sup> g <sup>-1</sup> ) | Adsorbate | [Adsorbate] μM | Adsorption efficiency (%) | Amount of sorbent (mg mL <sup>-1</sup> ) | Extraction conditions (h, °C) | Ref       |
|---------------------------|------------------------------------------------|-----------|----------------|---------------------------|------------------------------------------|-------------------------------|-----------|
| L-493                     | 1100                                           | OA        | 0.15           | 15.5                      | 12                                       | 72, 6                         | 2         |
|                           |                                                | DTX-1     | 0.12           | 16.9                      | 12                                       | 72, 6                         |           |
| HP-20                     | 588                                            | OA        | 0.15           | 31.6                      | 12                                       | 72, 6                         | 2         |
|                           |                                                | DTX-1     | 4.5            | 70                        | 300                                      | 24, n/a                       | 3         |
| SP825                     | 1000                                           | DTX-1     | 0.12           | 25.4                      | 12                                       | 72, 6                         | 2         |
|                           |                                                | OA        | 0.15           | 19.5                      | 12                                       | 72, 6                         | 2         |
| SP850                     | 1000                                           | DTX-1     | 0.12           | 19.0                      | 12                                       | 72, 6                         |           |
|                           |                                                | OA        | 0.15           | 18.4                      | 12                                       | 72, 6                         |           |
| XAD-4                     | 725                                            | DTX-1     | 0.12           | 19.3                      | 12                                       | 72, 6                         | 2         |
|                           |                                                | OA        | 0.15           | 16.9                      | 12                                       | 72, 6                         |           |
| Strata-X                  | 800                                            | OA        | 4.5            | 80                        | 300                                      | 24, n/a                       | 3         |
| Oasis HLB                 | 800                                            | OA        | 4.5            | 52                        | 300                                      | 24, n/a                       | 3         |
| 0.2-mTpBD-Me <sub>2</sub> | 538                                            | OA        | 10             | 94                        | 1                                        | 2, 19                         | This work |
|                           |                                                | DTX-1     | 10             | 98                        | 1                                        | 2, 19                         |           |

#### 14. Recycling

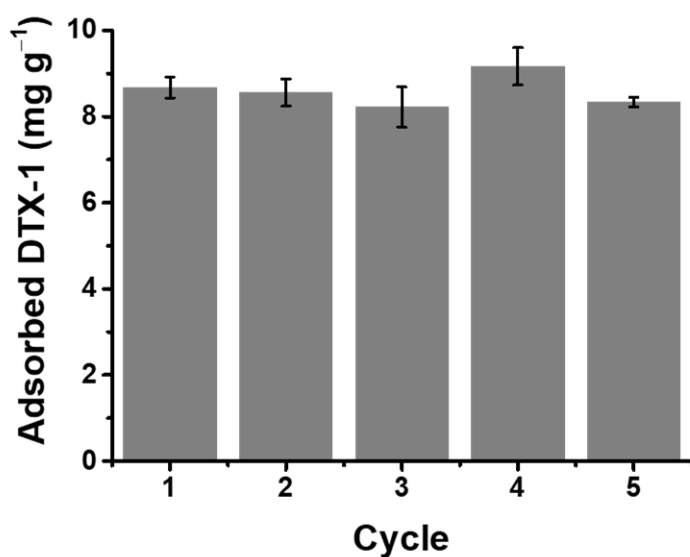

**Figure S14.1.** Reusability of 0.2-mTpBD-Me<sub>2</sub> in five consecutive adsorption/desorption cycles of DTX-1 with a concentration of biotoxin 10  $\mu$ M in synthetic seawater at 19 °C. Synthetic seawater was used as matrix for adsorption (19 °C, 2 h, 1400 rpm) and 2-propanol was used as solvent for desorption (19 °C, 4 h, 1400 rpm).

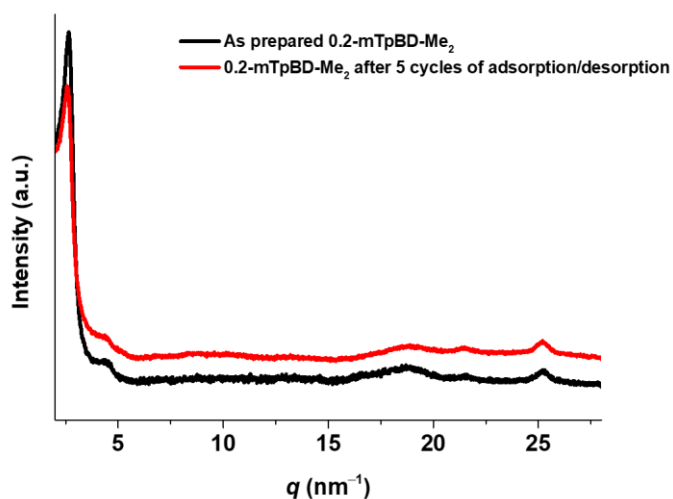

**Figure S14.2.** A comparison of the SAXS data of 0.2-mTpBD-Me<sub>2</sub> as prepared (black) and after five cycles of adsorption/desorption without spiking with biotoxins (red). To mimic the conditions of adsorption/desorption of biotoxins, five cycles were carried out with 18 mg of 0.2-mTpBD-Me<sub>2</sub> dispersed in 15 mL of synthetic seawater for adsorption and 30 mL of 2-propanol for desorption.

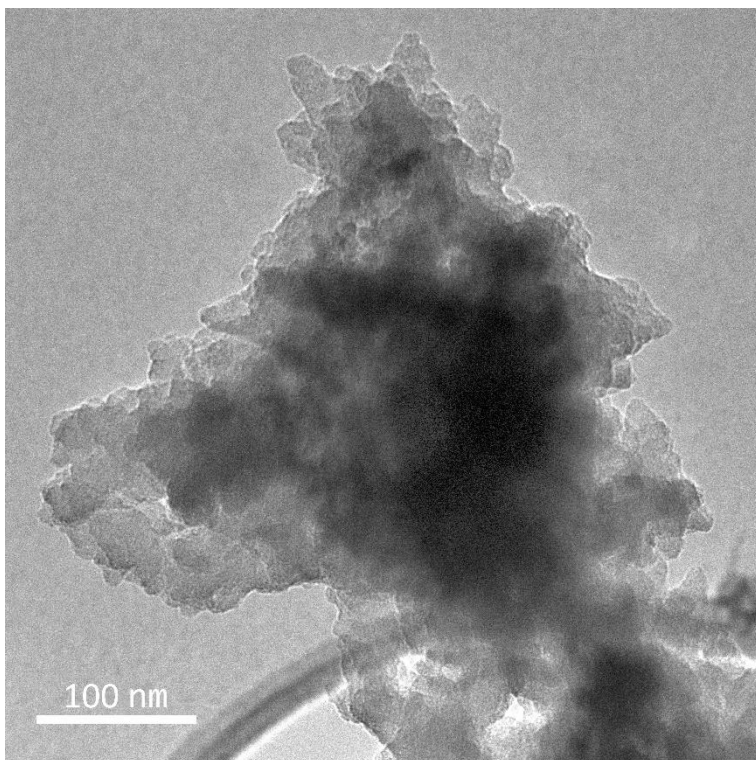

**Figure S14.3.** TEM characterization of 0.2-mTpBD-Me<sub>2</sub> after five cycles of adsorption/desorption.

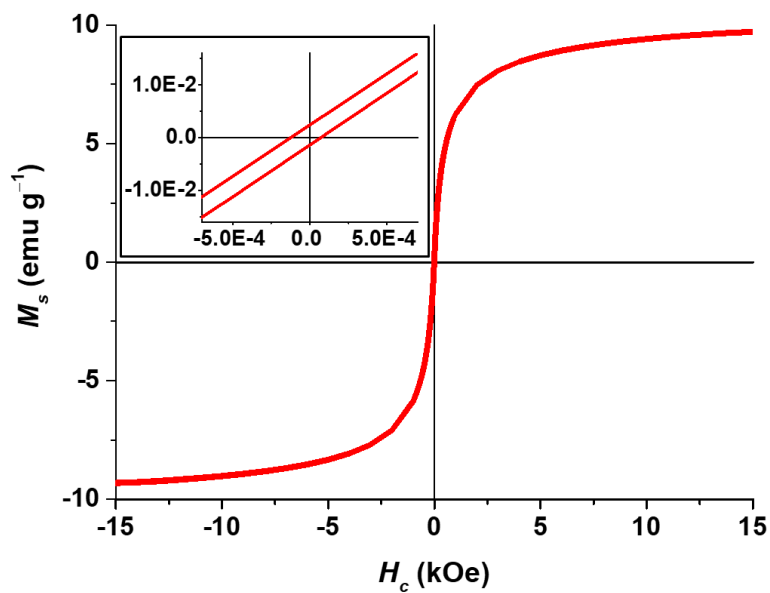

**Figure S14.4.** Hysteresis loop of 0.2-mTpBD-Me<sub>2</sub> after five cycles of adsorption/desorption.

## 15. Biotxin structures

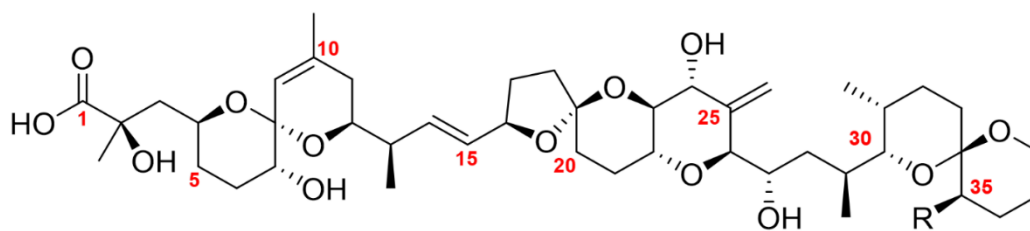

|                   | R                |
|-------------------|------------------|
| Okadaic acid (OA) | -H               |
| DTX-1             | -CH <sub>3</sub> |

**Figure S15.1.** The chemical structures of OA and DTX-1.

16. Magnetic separation of 0.2-mTpBD-Me<sub>2</sub> from seawater and 2-propanol

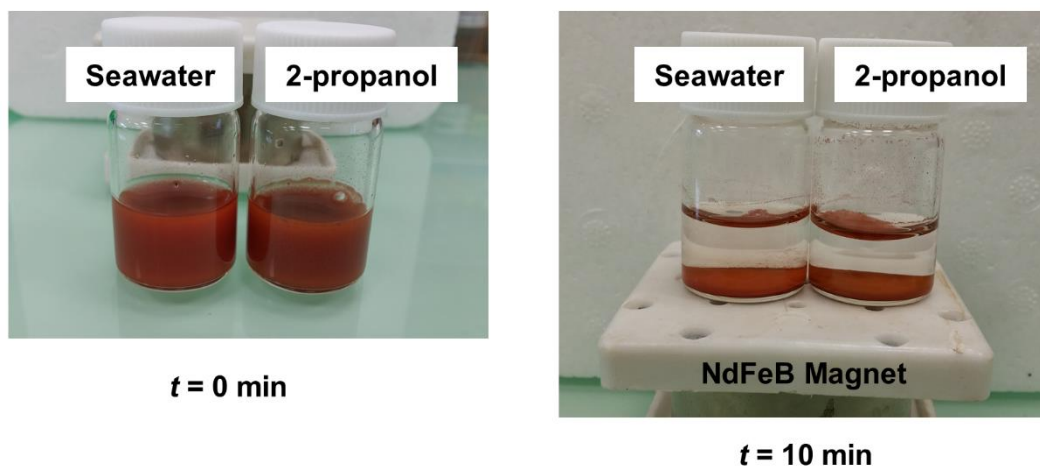

**Figure S16.1.** Image of 0.2-mTpBD-Me<sub>2</sub> dispersed in synthetic seawater and 2-propanol (left) and after magnetic separation (right) ([COF] = 1 mg mL<sup>-1</sup>).

## 17. References

- (1) Z. Chen, B. Xing and W. B. McGill, *J. Environ. Qual.*, 1999, **28**, 1422–1428.
- (2) E. Fux, C. Marcaillou, F. Mondeguer, R. Bire and P. Hess, *Harmful Algae*, 2008, **7**, 574–583.
- (3) Z. Zendong, C. Herrenknecht, E. Abadie, C. Brissard, C. Tixier, F. Mondeguer, V. Séchet, Z. Amzil and P. Hess, *Toxicon*, 2014, **91**, 57–68.
